# Supplementary material for: Molecular structure of clonidine: gas-phase electron diffraction, single-crystal X-ray diffraction and quantum chemical studies
Source: Royal Society of Chemistry journal article supplement (doi:10.1039/c6cp08401j), 2017-01-01
Supplement: c6cp08401j1.pdf [file c6cp08401j1.pdf]

**Electronic Supplementary Material (ESI)**

**Clonidine: molecule structure from gas-phase electron diffraction  
and quantum chemical calculations**

**Inna N. Kolesnikova <sup>\*</sup>, Anatolii N. Rykov , Igor F. Shishkov, Victor A. Tafeenko, Leonid A. Aslanov**

<sup>a</sup>Department of Chemistry, Lomonosov Moscow State University, Moscow 119991, Russia

<sup>\*</sup>E-mail: kolesnikova@phys.chem.msu.ru.

## Contents

|                                                                                                                                 |           |
|---------------------------------------------------------------------------------------------------------------------------------|-----------|
| <b>1 Information used for the GED model and results of the GED refinement.....</b>                                              | <b>3</b>  |
| <b>Table S1</b> Experimental intensities $I(s)$ and background lines $B(s)$ for clonidine.....                                  | 3         |
| <b>Table S2</b> Calculated and observed vibrational amplitudes of clonidine.....                                                | 6         |
| <b>Table S3</b> Matrix of correlation for GED refinement.....                                                                   | 8         |
| <b>Table S4</b> Cartesian coordinates of clonidine obtained from GED refinement.....                                            | 9         |
| <b>2 Results of quantum-chemical calculations.....</b>                                                                          | <b>10</b> |
| <i>2.1 Geometries and thermochemical properties for clonidine conformers obtained by the B3LYP/6-31G(d,p) calculations.....</i> | <i>10</i> |
| <b>Table S5</b> Cartesian coordinates of <b>I</b> conformer found using B3LYP/6-31G(d,p) calculations....                       | 10        |
| <b>Table S6</b> Cartesian coordinates of <b>A1</b> conformer found using B3LYP/6-31G(d,p) calculations..                        | 11        |
| <b>Table S7</b> Cartesian coordinates of <b>A2</b> conformer found using B3LYP/6-31G(d,p) calculations..                        | 12        |
| <b>Table S8</b> Cartesian coordinates of <b>A3</b> conformer found using B3LYP/6-31G(d,p) calculations..                        | 13        |
| <b>Table S9</b> Equilibrium distribution of clonidine conformers at 420 K by means of B3LYP/6-31G(d,p) calculations.....        | 14        |
| <i>2.2 Geometries and thermochemical properties for clonidine conformers obtained by the B3LYP/cc-pVTZ calculations.....</i>    | <i>15</i> |
| <b>Table S10</b> Cartesian coordinates of <b>I</b> conformer found using B3LYP/cc-pVTZ calculations.....                        | 15        |
| <b>Table S11</b> Cartesian coordinates of <b>A1</b> conformer found using B3LYP/cc-pVTZ calculations..                          | 16        |
| <b>Table S12</b> Cartesian coordinates of <b>A2</b> conformer found using B3LYP/cc-pVTZ calculations..                          | 17        |
| <b>Table S13</b> Cartesian coordinates of <b>A3</b> conformer found using B3LYP/cc-pVTZ calculations..                          | 18        |
| <b>Table S14</b> Equilibrium distribution of clonidine conformers at 420 K by means of B3LYP/cc-pVTZ calculations.....          | 19        |
| <i>2.3 Geometries and thermochemical properties for clonidine conformers obtained by the MP2/cc-pVTZ calculations.....</i>      | <i>20</i> |
| <b>Table S15</b> Cartesian coordinates of <b>I</b> conformer found using MP2/cc-pVTZ calculations.....                          | 20        |
| <b>Table S16</b> Cartesian coordinates of <b>A1</b> conformer found using MP2/cc-pVTZ calculations.....                         | 21        |
| <b>Table S17</b> Cartesian coordinates of <b>A2</b> conformer found using MP2/cc-pVTZ calculations.....                         | 22        |
| <b>Table S18</b> Cartesian coordinates of <b>A3</b> conformer found using MP2/cc-pVTZ calculations.....                         | 23        |

# 1 Information used for the GED model and results of the GED refinement

**Table S1** Experimental intensities  $I(s)$  and background lines  $B(s)$  for clonidine.

1) Nozzle-to-Plate distance = 362.3 mm. Scale factor = 0.53(1) electrons' wavelength  
 $\lambda = 0.049988 \text{ \AA}$ ,  $s$  in  $\text{\AA}^{-1}$

| $s$  | $I(s)$     | $B(s)$     | $s$  | $I(s)$     | $B(s)$     |
|------|------------|------------|------|------------|------------|
| 3.4  | 0.54730312 | 0.570601   | 11.0 | 0.52567541 | 0.52239242 |
| 3.6  | 0.54846914 | 0.58475209 | 11.2 | 0.52856442 | 0.52315327 |
| 3.8  | 0.54769755 | 0.59890317 | 11.4 | 0.5300357  | 0.52393669 |
| 4.0  | 0.54788661 | 0.61248457 | 11.6 | 0.52886426 | 0.52483926 |
| 4.2  | 0.56442034 | 0.62508736 | 11.8 | 0.52631748 | 0.5260438  |
| 4.4  | 0.59467537 | 0.63563348 | 12.0 | 0.52278873 | 0.52766829 |
| 4.6  | 0.6291482  | 0.6429818  | 12.2 | 0.5202981  | 0.52972297 |
| 4.8  | 0.65406861 | 0.64692225 | 12.4 | 0.52082432 | 0.53211993 |
| 5.0  | 0.67733225 | 0.64817669 | 12.6 | 0.52453115 | 0.53471968 |
| 5.2  | 0.68902711 | 0.64719805 | 12.8 | 0.52948715 | 0.53742547 |
| 5.4  | 0.69335453 | 0.64421686 | 13.0 | 0.53382516 | 0.54025662 |
| 5.6  | 0.69394545 | 0.63941965 | 13.2 | 0.53721985 | 0.54330471 |
| 5.8  | 0.68697468 | 0.63299379 | 13.4 | 0.54156688 | 0.54661308 |
| 6.0  | 0.66977066 | 0.62525168 | 13.6 | 0.54775475 | 0.55010715 |
| 6.2  | 0.64359303 | 0.61659328 | 13.8 | 0.55668414 | 0.5536795  |
| 6.4  | 0.61456521 | 0.60741479 | 14.0 | 0.56614603 | 0.55727578 |
| 6.6  | 0.5912247  | 0.59808432 | 14.2 | 0.57381137 | 0.56097917 |
| 6.8  | 0.57720399 | 0.58888526 | 14.4 | 0.57808351 | 0.56499504 |
| 7.0  | 0.5658096  | 0.58002125 | 14.6 | 0.58053404 | 0.56953932 |
| 7.2  | 0.55457021 | 0.57177393 | 14.8 | 0.5816826  | 0.57469046 |
| 7.4  | 0.5433938  | 0.56437109 | 15.0 | 0.58380968 | 0.58039482 |
| 7.6  | 0.53382693 | 0.55788334 | 15.2 | 0.58721797 | 0.58649277 |
| 7.8  | 0.53023379 | 0.55227457 | 15.4 | 0.59219154 | 0.59280621 |
| 8.0  | 0.53188583 | 0.54739219 | 15.6 | 0.59759865 | 0.59922051 |
| 8.2  | 0.53656742 | 0.54306882 | 15.8 | 0.60419018 | 0.60574829 |
| 8.4  | 0.54004752 | 0.53919843 | 16.0 | 0.61093058 | 0.61248118 |
| 8.6  | 0.54001631 | 0.53576737 | 16.2 | 0.61769314 | 0.6195769  |
| 8.8  | 0.53680761 | 0.53279072 | 16.4 | 0.62439813 | 0.62719816 |
| 9.0  | 0.53268169 | 0.53024341 | 16.6 | 0.63123236 | 0.63542161 |
| 9.2  | 0.53110734 | 0.52804532 | 16.8 | 0.63823386 | 0.64418063 |
| 9.4  | 0.53123715 | 0.52607946 | 17.0 | 0.64665926 | 0.65328236 |
| 9.6  | 0.53184809 | 0.52431116 | 17.2 | 0.65473316 | 0.66249116 |
| 9.8  | 0.53057416 | 0.52280441 | 17.4 | 0.66403168 | 0.67169997 |
| 10.0 | 0.52759149 | 0.52167931 | 10.8 | 0.52277844 | 0.5216808  |
| 10.2 | 0.52370299 | 0.5210249  | 11.0 | 0.52567541 | 0.52239242 |
| 10.4 | 0.52130825 | 0.52086396 | 11.2 | 0.52856442 | 0.52315327 |
| 10.6 | 0.52099621 | 0.52112485 | 17.4 | 0.66403168 | 0.67169997 |
| 10.8 | 0.52277844 | 0.5216808  |      |            |            |

2) Nozzle-to-Plate distance = 193.9 mm. Scale factor = 0.64(2) electrons' wavelength  
 $\lambda = 0.050388 \text{ \AA}$ ,  $s$  in  $\text{\AA}^{-1}$

| $s$  | $I(s)$   | $B(s)$   | $s$  | $I(s)$   | $B(s)$   | $s$  | $I(s)$   | $B(s)$   |
|------|----------|----------|------|----------|----------|------|----------|----------|
| 6.8  | 0.619235 | 0.634517 | 15.6 | 0.473891 | 0.475779 | 24.4 | 0.417467 | 0.417091 |
| 7.0  | 0.610824 | 0.629312 | 15.8 | 0.47182  | 0.473736 | 24.6 | 0.415307 | 0.416434 |
| 7.2  | 0.603646 | 0.624107 | 16.0 | 0.470207 | 0.471789 | 24.8 | 0.414242 | 0.415786 |
| 7.4  | 0.590841 | 0.618937 | 16.2 | 0.468481 | 0.46992  | 25.0 | 0.413344 | 0.415141 |
| 7.6  | 0.582616 | 0.613858 | 16.4 | 0.466287 | 0.468097 | 25.2 | 0.412671 | 0.414505 |
| 7.8  | 0.579447 | 0.608859 | 16.6 | 0.463333 | 0.46629  | 25.4 | 0.412634 | 0.413892 |
| 8.0  | 0.584445 | 0.603869 | 16.8 | 0.459573 | 0.46449  | 25.6 | 0.412659 | 0.41331  |
| 8.2  | 0.590194 | 0.598788 | 17.0 | 0.4565   | 0.462714 | 25.8 | 0.411977 | 0.412766 |
| 8.4  | 0.594769 | 0.593595 | 17.2 | 0.454377 | 0.460979 | 26.0 | 0.411743 | 0.412276 |
| 8.6  | 0.595365 | 0.588318 | 17.4 | 0.452985 | 0.459298 | 26.2 | 0.411522 | 0.41184  |
| 8.8  | 0.588225 | 0.583029 | 17.6 | 0.452274 | 0.457677 | 26.4 | 0.411448 | 0.411451 |
| 9.0  | 0.580147 | 0.577884 | 17.8 | 0.452302 | 0.456117 | 26.6 | 0.411178 | 0.411107 |
| 9.2  | 0.575239 | 0.573026 | 18.0 | 0.452725 | 0.454604 | 26.8 | 0.411199 | 0.410813 |
| 9.4  | 0.575208 | 0.56849  | 18.2 | 0.453286 | 0.453126 | 27.0 | 0.411192 | 0.410571 |
| 9.6  | 0.573333 | 0.564215 | 18.4 | 0.454516 | 0.45169  | 27.2 | 0.410726 | 0.410382 |
| 9.8  | 0.570712 | 0.560148 | 18.6 | 0.455734 | 0.450313 | 27.4 | 0.410426 | 0.41025  |
| 10.0 | 0.563507 | 0.556241 | 18.8 | 0.456337 | 0.449007 | 27.6 | 0.410297 | 0.410177 |
| 10.2 | 0.556656 | 0.552464 | 19.0 | 0.456491 | 0.447766 | 27.8 | 0.410298 | 0.41016  |
| 10.4 | 0.549971 | 0.548773 | 19.2 | 0.454902 | 0.446555 | 28.0 | 0.410462 | 0.410195 |
| 10.6 | 0.544753 | 0.545145 | 19.4 | 0.45226  | 0.445334 | 28.2 | 0.410853 | 0.410281 |
| 10.8 | 0.542786 | 0.541592 | 19.6 | 0.448507 | 0.444074 | 28.4 | 0.411221 | 0.410417 |
| 11.0 | 0.541754 | 0.538111 | 19.8 | 0.444565 | 0.442759 | 28.6 | 0.411336 | 0.410606 |
| 11.2 | 0.540819 | 0.534691 | 20.0 | 0.440108 | 0.441385 | 28.8 | 0.41148  | 0.410859 |
| 11.4 | 0.538432 | 0.531318 | 20.2 | 0.436443 | 0.439967 | 29.0 | 0.411528 | 0.411193 |
| 11.6 | 0.532983 | 0.527988 | 20.4 | 0.433708 | 0.438527 | 29.2 | 0.411619 | 0.411627 |
| 11.8 | 0.525583 | 0.524709 | 20.6 | 0.432207 | 0.437091 | 29.4 | 0.41182  | 0.412176 |
| 12.0 | 0.516266 | 0.521484 | 20.8 | 0.431442 | 0.435685 | 29.6 | 0.41245  | 0.412846 |
| 12.2 | 0.507535 | 0.518322 | 21.0 | 0.431339 | 0.434326 | 29.8 | 0.41309  | 0.413626 |
| 12.4 | 0.502026 | 0.515243 | 21.2 | 0.430981 | 0.433012 | 30.0 | 0.414001 | 0.414496 |
| 12.6 | 0.499993 | 0.512264 | 21.4 | 0.429985 | 0.431735 | 30.2 | 0.414963 | 0.415425 |
| 12.8 | 0.500091 | 0.509391 | 21.6 | 0.428551 | 0.430498 | 30.4 | 0.415891 | 0.416383 |
| 13.0 | 0.49976  | 0.506615 | 21.8 | 0.427826 | 0.429309 | 30.6 | 0.417235 | 0.417339 |
| 13.2 | 0.4978   | 0.503922 | 22.0 | 0.427402 | 0.428161 | 30.8 | 0.417873 | 0.418272 |
| 13.4 | 0.495872 | 0.501305 | 22.2 | 0.427134 | 0.427044 | 31.0 | 0.418584 | 0.419195 |
| 13.6 | 0.496193 | 0.498761 | 22.4 | 0.426719 | 0.425947 | 31.2 | 0.419861 | 0.420134 |
| 13.8 | 0.498582 | 0.49629  | 22.6 | 0.426062 | 0.42487  | 31.4 | 0.420568 | 0.421114 |
| 14.0 | 0.502867 | 0.493892 | 22.8 | 0.424895 | 0.42382  | 31.6 | 0.421972 | 0.422168 |
| 14.2 | 0.50482  | 0.491547 | 23.0 | 0.424082 | 0.422811 | 31.8 | 0.423271 | 0.423313 |
| 14.4 | 0.503315 | 0.489235 | 23.2 | 0.423231 | 0.421849 | 32.0 | 0.424834 | 0.424556 |
| 14.6 | 0.498681 | 0.486943 | 23.4 | 0.423087 | 0.420934 | 32.2 | 0.426183 | 0.425892 |
| 14.8 | 0.492166 | 0.484656 | 23.6 | 0.422328 | 0.420062 | 32.4 | 0.42769  | 0.427313 |
| 15.0 | 0.485883 | 0.482379 | 23.8 | 0.421574 | 0.41924  | 32.6 | 0.429789 | 0.428793 |
| 15.2 | 0.480684 | 0.480124 | 24.0 | 0.420352 | 0.418474 | 32.8 | 0.431173 | 0.430272 |
| 15.4 | 0.476791 | 0.477915 | 24.2 | 0.418711 | 0.417763 |      |          |          |

**Table S2** Calculated and observed vibrational amplitudes in clonidine

| Distance  | GED                  | Calc <sup>b</sup> | GED <sup>c</sup>      | Distance   | GED                  | Calc <sup>b</sup> | GED <sup>c</sup>      |
|-----------|----------------------|-------------------|-----------------------|------------|----------------------|-------------------|-----------------------|
|           | <i>r<sub>a</sub></i> | <i>u</i>          | <i>u</i>              |            | <i>r<sub>a</sub></i> | <i>u</i>          | <i>u</i>              |
| N3–H14    | 1.033                | 0.072             | assumed               | H14...Cl23 | 4.528                | 0.353             | assumed               |
| N1–H13    | 1.033                | 0.072             | assumed               | N1...C9    | 4.552                | 0.230             | 0.230(8) <sup>7</sup> |
| C9–H20    | 1.083                | 0.077             | assumed               | N6...H22   | 4.563                | 0.114             | assumed               |
| C11–H22   | 1.083                | 0.077             | assumed               | C10...H13  | 4.565                | 0.358             | assumed               |
| C10–H21   | 1.085                | 0.077             | assumed               | N3...C12   | 4.586                | 0.133             | 0.133(8) <sup>7</sup> |
| C5–H17    | 1.109                | 0.078             | assumed               | N6...H20   | 4.605                | 0.113             | assumed               |
| C4–H16    | 1.110                | 0.078             | assumed               | N3...Cl23  | 4.615                | 0.272             | 0.272(8) <sup>7</sup> |
| C5–H18    | 1.116                | 0.079             | assumed               | C2...C11   | 4.628                | 0.142             | 0.142(8) <sup>7</sup> |
| C4–H15    | 1.117                | 0.079             | assumed               | C4...C7    | 4.649                | 0.096             | 0.096(8) <sup>7</sup> |
| C2–N6     | 1.287                | 0.041             | 0.042(2) <sup>1</sup> | C7...H18   | 4.686                | 0.217             | assumed               |
| C2–N3     | 1.386                | 0.048             | 0.049(2) <sup>1</sup> | C5...C8    | 4.713                | 4.732             | 0.232(8) <sup>7</sup> |
| N6–C7     | 1.389                | 0.048             | 0.049(2) <sup>1</sup> | C12...H14  | 4.758                | 0.213             | assumed               |
| N1–C2     | 1.390                | 0.049             | 0.050(2) <sup>1</sup> | H21...Cl23 | 4.823                | 0.116             | assumed               |
| C11–C12   | 1.394                | 0.047             | 0.048(2) <sup>1</sup> | C8...H18   | 4.834                | 0.331             | assumed               |
| C8–C9     | 1.396                | 0.047             | 0.048(2) <sup>1</sup> | Cl19...H21 | 4.836                | 0.117             | assumed               |
| C9–C10    | 1.396                | 0.046             | 0.048(2) <sup>1</sup> | H14...Cl19 | 4.866                | 0.286             | assumed               |
| C10–C11   | 1.398                | 0.046             | 0.048(2) <sup>1</sup> | N1...C11   | 4.873                | 0.312             | 0.312(8) <sup>7</sup> |
| C7–C8     | 1.416                | 0.048             | 0.050(2) <sup>1</sup> | C8...H14   | 4.905                | 0.164             | assumed               |
| C7–C12    | 1.416                | 0.048             | 0.050(2) <sup>1</sup> | C7...H17   | 5.003                | 0.179             | assumed               |
| N3–C4     | 1.467                | 0.051             | 0.052(2) <sup>1</sup> | C7...H15   | 5.054                | 0.219             | assumed               |
| N1–C5     | 1.471                | 0.052             | 0.053(2) <sup>1</sup> | C2...C10   | 5.078                | 0.122             | 0.122(8) <sup>7</sup> |
| C4–C5     | 1.548                | 0.054             | 0.056(2) <sup>1</sup> | C4...Cl19  | 5.084                | 0.342             | 0.342(8) <sup>7</sup> |
| C12–Cl23  | 1.733                | 0.053             | 0.050(3) <sup>2</sup> | H17...Cl19 | 5.139                | 0.510             | assumed               |
| C8–Cl19   | 1.741                | 0.054             | 0.051(3) <sup>2</sup> | N1...C10   | 5.183                | 0.259             | 0.260(8) <sup>7</sup> |
| H15...H16 | 1.803                | 0.125             | assumed               | N1...H20   | 5.194                | 0.295             | assumed               |
| H17...H18 | 1.804                | 0.125             | assumed               | C2...H20   | 5.234                | 0.173             | assumed               |
| C2...H14  | 2.055                | 0.103             | assumed               | N3...Cl19  | 4.269                | 0.264             | 0.264(8) <sup>7</sup> |
| C2...H13  | 2.069                | 0.103             | assumed               | C5...C7    | 4.289                | 0.131             | 0.132(8) <sup>7</sup> |
| N1...H18  | 2.134                | 0.105             | assumed               | H20...H22  | 4.292                | 0.132             | assumed               |
| N1...H17  | 2.138                | 0.106             | assumed               | N1...Cl23  | 4.297                | 0.452             | 0.452(8) <sup>7</sup> |
| C12...H22 | 2.140                | 0.100             | assumed               | C5...Cl19  | 4.327                | 0.451             | 0.451(8) <sup>7</sup> |
| C8...H20  | 2.141                | 0.101             | assumed               | N6...H16   | 4.402                | 0.113             | assumed               |
| N3...H16  | 2.141                | 0.105             | assumed               | H13...H20  | 4.409                | 0.377             | assumed               |
| N3...H15  | 2.147                | 0.105             | assumed               | N6...H17   | 4.428                | 0.113             | assumed               |
| C9...H21  | 2.148                | 0.101             | assumed               | N3...C8    | 4.437                | 0.136             | 0.137(8) <sup>7</sup> |
| C11...H21 | 2.150                | 0.101             | assumed               | H13...Cl23 | 4.451                | 0.517             | assumed               |
| C10...H20 | 2.157                | 0.100             | assumed               | C11...H13  | 4.462                | 0.423             | assumed               |
| C10...H22 | 2.159                | 0.101             | assumed               | C2...C9    | 4.481                | 0.120             | 0.121(8) <sup>7</sup> |
| C4...H14  | 2.173                | 0.107             | assumed               | C9...Cl23  | 4.498                | 0.072             | 0.072(8) <sup>7</sup> |
| C5...H13  | 2.174                | 0.106             | assumed               | C11...Cl19 | 4.508                | 0.072             | 0.073(8) <sup>7</sup> |
| C4...H18  | 2.198                | 0.112             | assumed               | H14...Cl23 | 4.528                | 0.353             | assumed               |
| C5...H15  | 2.201                | 0.112             | assumed               | N1...C9    | 4.552                | 0.230             | 0.230(8) <sup>7</sup> |
| C4...H17  | 2.217                | 0.111             | assumed               | N6...H22   | 4.563                | 0.114             | assumed               |
| C5...H16  | 2.228                | 0.111             | assumed               | C10...H13  | 4.565                | 0.358             | assumed               |
| N1...N3   | 2.246                | 0.057             | 0.060(5) <sup>3</sup> | N3...C12   | 4.586                | 0.133             | 0.133(8) <sup>7</sup> |
| N3...C5   | 2.302                | 0.065             | 0.068(5) <sup>3</sup> | N6...H20   | 4.605                | 0.113             | assumed               |
| C2...C5   | 2.318                | 0.060             | 0.063(5) <sup>3</sup> | N3...Cl23  | 4.615                | 0.272             | 0.272(8) <sup>7</sup> |

|            |       |       |                        |             |       |       |                       |
|------------|-------|-------|------------------------|-------------|-------|-------|-----------------------|
| C2...C7    | 2.335 | 0.072 | 0.075(5) <sup>3</sup>  | C2...C11    | 4.628 | 0.142 | 0.142(8) <sup>7</sup> |
| C2...C4    | 2.343 | 0.060 | 0.063(5) <sup>3</sup>  | C4...C7     | 4.649 | 0.096 | 0.096(8) <sup>7</sup> |
| N3...N6    | 2.344 | 0.060 | 0.063(5) <sup>3</sup>  | C7...H18    | 4.686 | 0.217 | assumed               |
| N1...C4    | 2.352 | 0.066 | 0.068(5) <sup>3</sup>  | C5...C8     | 4.713 | 4.732 | 0.232(8) <sup>7</sup> |
| C8...C12   | 2.385 | 0.060 | 0.063(5) <sup>3</sup>  | C12...H14   | 4.758 | 0.213 | assumed               |
| C10...C12  | 2.408 | 0.058 | 0.061(5) <sup>3</sup>  | H21...Cl23  | 4.823 | 0.116 | assumed               |
| C8...C10   | 2.410 | 0.058 | 0.061(5) <sup>3</sup>  | C8...H18    | 4.834 | 0.331 | assumed               |
| N1...N6    | 2.414 | 0.061 | 0.063(5) <sup>3</sup>  | Cl19...H21  | 4.836 | 0.117 | assumed               |
| C9...C11   | 2.415 | 0.058 | 0.061(5) <sup>3</sup>  | H14...Cl19  | 4.866 | 0.286 | assumed               |
| H15...H17  | 2.429 | 0.182 | assumed                | N1...C11    | 4.873 | 0.312 | 0.312(8) <sup>7</sup> |
| N6...C12   | 2.433 | 0.067 | 0.070(5) <sup>3</sup>  | C8...H14    | 4.905 | 0.164 | assumed               |
| H16...H18  | 2.438 | 0.182 | assumed                | C7...H17    | 5.003 | 0.179 | assumed               |
| C7...C9    | 2.468 | 0.059 | 0.062(5) <sup>3</sup>  | C7...H15    | 5.054 | 0.219 | assumed               |
| C7...C11   | 2.469 | 0.059 | 0.062(5) <sup>3</sup>  | C2...C10    | 5.078 | 0.122 | 0.122(8) <sup>7</sup> |
| N6...C8    | 2.477 | 0.067 | 0.070(5) <sup>3</sup>  | C4...Cl19   | 5.084 | 0.342 | 0.342(8) <sup>7</sup> |
| H20...H21  | 2.486 | 0.164 | assumed                | N1...C11    | 4.873 | 0.312 | 0.312(8) <sup>7</sup> |
| H21...H22  | 2.488 | 0.164 | assumed                | C8...H14    | 4.905 | 0.164 | assumed               |
| H13...H18  | 2.507 | 0.192 | assumed                | C7...H17    | 5.003 | 0.179 | assumed               |
| H14...H15  | 2.542 | 0.188 | assumed                | C7...H15    | 5.054 | 0.219 | assumed               |
| N6...H14   | 2.573 | 0.142 | assumed                | C2...C10    | 5.078 | 0.122 | 0.122(8) <sup>7</sup> |
| H14...H16  | 2.645 | 0.158 | assumed                | C4...Cl19   | 5.084 | 0.342 | 0.342(8) <sup>7</sup> |
| H13...H17  | 2.649 | 0.158 | assumed                | H17...Cl19  | 5.139 | 0.510 | assumed               |
| C11...Cl23 | 2.683 | 0.070 | 0.070(3) <sup>4</sup>  | N1...C10    | 5.183 | 0.259 | 0.260(8) <sup>7</sup> |
| C9...Cl19  | 2.697 | 0.070 | 0.070(3) <sup>4</sup>  | N1...H20    | 5.194 | 0.295 | assumed               |
| N6...H13   | 2.712 | 0.137 | assumed                | C2...H20    | 5.234 | 0.173 | assumed               |
| C7...Cl23  | 2.712 | 0.070 | 0.070(3) <sup>4</sup>  | C5...C12    | 5.241 | 0.288 | 0.291(9) <sup>8</sup> |
| C7...Cl19  | 2.715 | 0.072 | 0.072(3) <sup>4</sup>  | N6...H21    | 5.302 | 0.101 | assumed               |
| C7...H13   | 2.718 | 0.217 | assumed                | H13...H22   | 5.330 | 0.499 | assumed               |
| C9...C12   | 2.772 | 0.066 | 0.066(3) <sup>4</sup>  | H15...Cl23  | 5.362 | 0.567 | assumed               |
| C8...C11   | 2.775 | 0.067 | 0.066(3) <sup>4</sup>  | C4...C8     | 5.370 | 0.167 | 0.170(9) <sup>8</sup> |
| N3...H18   | 2.787 | 0.167 | assumed                | Cl19...Cl23 | 5.414 | 0.095 | 0.098(9) <sup>8</sup> |
| H22...Cl23 | 2.798 | 0.149 | assumed                | C8...H17    | 5.418 | 0.265 | assumed               |
| H16...H17  | 2.804 | 0.160 | assumed                | C2...H22    | 5.458 | 0.192 | assumed               |
| Cl19...H20 | 2.812 | 0.150 | assumed                | C4...Cl23   | 5.491 | 0.417 | 0.419(9) <sup>8</sup> |
| H13...Cl19 | 2.830 | 0.544 | assumed                | H13...H21   | 5.492 | 0.392 | assumed               |
| N1...H15   | 2.842 | 0.168 | assumed                | C4...C12    | 5.545 | 0.470 | 0.473(9) <sup>8</sup> |
| C7...C10   | 2.852 | 0.066 | 0.066(3) <sup>4</sup>  | C5...Cl23   | 5.545 | 0.228 | 0.231(9) <sup>8</sup> |
| C8...H13   | 2.857 | 0.289 | assumed                | C7...H16    | 5.553 | 0.127 | assumed               |
| C2...H18   | 2.858 | 0.152 | assumed                | H20...Cl23  | 5.568 | 0.102 | assumed               |
| C2...H15   | 2.891 | 0.153 | assumed                | Cl19...H22  | 5.578 | 0.102 | assumed               |
| N1...C7    | 2.896 | 0.137 | 0.142(14) <sup>5</sup> | H16...Cl19  | 5.647 | 0.416 | assumed               |
| N6...Cl23  | 2.973 | 0.119 | 0.125(14) <sup>5</sup> | N1...H22    | 5.690 | 0.387 | assumed               |
| N6...Cl19  | 3.052 | 0.125 | 0.131(14) <sup>5</sup> | C12...H15   | 5.716 | 0.364 | assumed               |
| H15...H18  | 3.083 | 0.132 | assumed                | C12...H17   | 5.785 | 0.384 | assumed               |
| N3...H13   | 3.141 | 0.104 | assumed                | N3...C9     | 5.787 | 0.129 | 0.132(9) <sup>8</sup> |
| N1...H14   | 3.148 | 0.102 | assumed                | C12...H18   | 5.803 | 0.290 | assumed               |
| C2...C8    | 3.166 | 0.121 | 0.127(14) <sup>5</sup> | C5...C9     | 5.885 | 0.263 | 0.265(9) <sup>8</sup> |
| C2...H17   | 3.220 | 0.104 | assumed                | N3...C11    | 5.902 | 0.125 | 0.128(9) <sup>8</sup> |
| C2...H16   | 3.241 | 0.104 | assumed                | H15...Cl19  | 5.907 | 0.334 | assumed               |
| N3...H17   | 3.249 | 0.103 | assumed                | C8...H15    | 5.945 | 0.220 | assumed               |
| C5...H14   | 3.275 | 0.097 | assumed                | H17...Cl23  | 5.984 | 0.613 | assumed               |
| N1...H16   | 3.295 | 0.104 | assumed                | C9...H18    | 5.998 | 0.364 | assumed               |

|            |       |       |                        |            |       |       |                       |
|------------|-------|-------|------------------------|------------|-------|-------|-----------------------|
| C2...C119  | 3.297 | 0.212 | 0.217(14) <sup>5</sup> | C11...H14  | 6.123 | 0.203 | assumed               |
| C4...H13   | 3.313 | 0.098 | assumed                | C2...H21   | 6.136 | 0.149 | assumed               |
| C2...C12   | 3.369 | 0.147 | 0.153(14) <sup>5</sup> | N1...H21   | 6.168 | 0.296 | assumed               |
| C12...H21  | 3.384 | 0.097 | assumed                | C8...H16   | 6.173 | 0.227 | assumed               |
| C8...H21   | 3.385 | 0.097 | assumed                | C9...H14   | 6.240 | 0.156 | assumed               |
| C11...H20  | 3.394 | 0.097 | assumed                | C5...C11   | 6.319 | 0.318 | 0.320(9) <sup>8</sup> |
| C9...H22   | 3.394 | 0.097 | assumed                | H18...C123 | 6.331 | 0.410 | assumed               |
| N1...C8    | 3.398 | 0.219 | 0.214(14) <sup>5</sup> | H18...H20  | 6.376 | 0.453 | assumed               |
| N1...C119  | 3.399 | 0.404 | 0.399(14) <sup>5</sup> | N3...C10   | 6.410 | 0.106 | 0.109(9) <sup>8</sup> |
| C7...H20   | 3.427 | 0.098 | assumed                | C5...H20   | 6.419 | 0.348 | assumed               |
| C7...H22   | 3.429 | 0.098 | assumed                | C9...H17   | 6.464 | 0.315 | assumed               |
| C4...N6    | 3.555 | 0.068 | 0.073(14) <sup>5</sup> | N3...H20   | 6.495 | 0.195 | assumed               |
| C5...N6    | 3.569 | 0.066 | 0.072(14) <sup>5</sup> | H16...C123 | 6.496 | 0.390 | assumed               |
| N3...C7    | 3.616 | 0.069 | 0.075(14) <sup>5</sup> | C12...H16  | 6.530 | 0.206 | assumed               |
| C12...H13  | 3.626 | 0.396 | assumed                | C5...C10   | 6.600 | 0.278 | 0.281(9) <sup>8</sup> |
| N6...C11   | 3.719 | 0.068 | 0.074(14) <sup>5</sup> | C4...C9    | 6.660 | 0.178 | 0.181(9) <sup>8</sup> |
| C2...C123  | 3.726 | 0.250 | 0.256(14) <sup>5</sup> | N3...H22   | 6.677 | 0.187 | assumed               |
| N6...C9    | 3.749 | 0.068 | 0.074(14) <sup>5</sup> | C10...H14  | 6.758 | 0.160 | assumed               |
| H14...H18  | 3.771 | 0.187 | assumed                | C11...H17  | 6.774 | 0.427 | assumed               |
| N1...C12   | 3.814 | 0.300 | 0.306(14) <sup>5</sup> | C4...C11   | 6.802 | 0.236 | 0.239(9) <sup>8</sup> |
| H13...H15  | 3.826 | 0.186 | assumed                | C11...H18  | 6.810 | 0.333 | assumed               |
| C12...H20  | 3.845 | 0.098 | assumed                | H14...H22  | 6.822 | 0.263 | assumed               |
| C8...H22   | 3.848 | 0.098 | assumed                | C10...H18  | 6.896 | 0.345 | assumed               |
| C9...H13   | 3.861 | 0.312 | assumed                | H17...H20  | 6.980 | 0.410 | assumed               |
| C7...H21   | 3.926 | 0.098 | assumed                | C11...H15  | 6.981 | 0.380 | assumed               |
| C7...H14   | 3.936 | 0.146 | assumed                | H14...H20  | 7.007 | 0.203 | assumed               |
| C10...C123 | 3.982 | 0.070 | 0.076(4) <sup>6</sup>  | C10...H17  | 7.081 | 0.360 | assumed               |
| C8...C123  | 3.986 | 0.070 | 0.077(4) <sup>6</sup>  | C5...H22   | 7.114 | 0.406 | assumed               |
| C12...C119 | 3.991 | 0.071 | 0.078(4) <sup>6</sup>  | C9...H15   | 7.173 | 0.248 | assumed               |
| C10...C119 | 3.994 | 0.070 | 0.077(4) <sup>6</sup>  | C4...C10   | 7.288 | 0.187 | 0.190(9) <sup>8</sup> |
| N6...H15   | 4.002 | 0.183 | assumed                | C4...H20   | 7.309 | 0.255 | assumed               |
| N6...H18   | 4.018 | 0.179 | assumed                | N3...H21   | 7.471 | 0.135 | assumed               |
| H13...H14  | 4.022 | 0.129 | assumed                | H17...H22  | 7.485 | 0.547 | assumed               |
| H18...C119 | 4.062 | 0.548 | assumed                | C9...H16   | 7.492 | 0.234 | assumed               |
| H14...H17  | 4.149 | 0.143 | assumed                | C4...H22   | 7.537 | 0.320 | assumed               |
| H13...H16  | 4.176 | 0.147 | assumed                | C5...H21   | 7.566 | 0.325 | assumed               |
| N6...C10   | 4.231 | 0.071 | 0.077(4) <sup>6</sup>  | H15...H22  | 7.595 | 0.475 | assumed               |
| N3...C119  | 4.269 | 0.264 | 0.264(8) <sup>7</sup>  | C10...H15  | 7.629 | 0.307 | assumed               |
| C5...C7    | 4.289 | 0.131 | 0.132(8) <sup>7</sup>  | H18...H22  | 7.689 | 0.393 | assumed               |
| H20...H22  | 4.292 | 0.132 | assumed                | C11...H16  | 7.790 | 0.214 | assumed               |
| N1...C123  | 4.297 | 0.452 | 0.452(8) <sup>7</sup>  | H14...H21  | 7.823 | 0.178 | assumed               |
| C5...C119  | 4.327 | 0.451 | 0.451(8) <sup>7</sup>  | H18...H21  | 7.836 | 0.390 | assumed               |
| N6...H16   | 4.402 | 0.113 | assumed                | H15...H20  | 7.906 | 0.288 | assumed               |
| H13...H20  | 4.409 | 0.377 | assumed                | H17...H21  | 7.987 | 0.420 | assumed               |
| N6...H17   | 4.428 | 0.113 | assumed                | H16...H20  | 8.068 | 0.323 | assumed               |
| N3...C8    | 4.437 | 0.136 | 0.137(8) <sup>7</sup>  | C10...H16  | 8.214 | 0.199 | assumed               |
| H13...C123 | 4.451 | 0.517 | assumed                | C4...H21   | 8.317 | 0.224 | assumed               |
| C11...H13  | 4.462 | 0.423 | assumed                | H16...H22  | 8.554 | 0.291 | assumed               |
| C2...C9    | 4.481 | 0.120 | 0.121(8) <sup>7</sup>  | H15...H21  | 8.642 | 0.342 | assumed               |
| C9...C123  | 4.498 | 0.072 | 0.072(8) <sup>7</sup>  | H16...H21  | 9.244 | 0.233 | assumed               |
| C11...C119 | 4.508 | 0.072 | 0.073(8) <sup>7</sup>  |            |       |       |                       |

<sup>a</sup>Values of distances ( $r_a$ ), and amplitudes ( $u$ ) are in Å.

<sup>b</sup> Calculated with B3LYP/6-31G(d,p) quadratic force constants.

<sup>c</sup>The same numeric superscripts indicate that these amplitudes were refined in one group; differences between their values were assumed from theoretical calculation. Amplitudes without superscript were constrained to the calculated values.

**Table S3** Matrix of correlation for GED refinement. Parameters 10 and 20 are the scale factors for LD and SD, respectively. The definition of all other parameters can be found in Tab. 4 and S2.

|    |         |         |         |         |         |         |         |         |
|----|---------|---------|---------|---------|---------|---------|---------|---------|
|    | 10      | 20      | b       | c       | d       | e       | f       | g       |
| 10 | 1.0000  |         |         |         |         |         |         |         |
| 20 | 0.5036  | 1.0000  |         |         |         |         |         |         |
| b  | -0.1958 | -0.1676 | 1.0000  |         |         |         |         |         |
| c  | 0.3205  | 0.3627  | -0.3938 | 1.0000  |         |         |         |         |
| d  | -0.4115 | -0.3600 | 0.3804  | -0.4945 | 1.0000  |         |         |         |
| e  | 0.0397  | 0.0012  | -0.0583 | -0.0359 | -0.0210 | 1.0000  |         |         |
| f  | -0.3584 | -0.1979 | 0.3160  | -0.0823 | 0.4296  | -0.5576 | 1.0000  |         |
| g  | 0.0721  | 0.0881  | -0.0323 | 0.3002  | -0.0904 | 0.0108  | -0.0302 | 1.0000  |
| h  | 0.1669  | 0.2227  | -0.3445 | 0.1841  | -0.2652 | 0.0694  | -0.2023 | -0.0002 |
| j  | 0.0479  | 0.0937  | -0.1006 | -0.1784 | -0.1775 | 0.0140  | -0.0478 | -0.1331 |
| k  | -0.0643 | 0.0087  | 0.2971  | -0.0003 | 0.1269  | 0.0224  | 0.0861  | 0.6005  |
| l  | -0.1441 | -0.0349 | 0.2301  | -0.0729 | 0.2315  | -0.1068 | 0.2050  | 0.0769  |
| n  | -0.1064 | 0.0070  | 0.0929  | -0.1659 | 0.0664  | -0.0208 | 0.1158  | -0.0201 |
| 1  | 0.1477  | 0.3451  | 0.2747  | -0.5926 | 0.3120  | -0.0087 | -0.0420 | -0.1218 |
| 2  | 0.1818  | 0.4141  | 0.0034  | -0.1164 | 0.0157  | 0.0195  | -0.0582 | -0.0557 |
| 3  | 0.4015  | 0.5379  | -0.3673 | 0.6451  | -0.4254 | -0.0914 | -0.0230 | 0.0699  |
| 4  | 0.1240  | 0.2930  | -0.1506 | 0.0013  | -0.1412 | 0.0058  | -0.1184 | 0.1013  |
| 5  | -0.0791 | -0.1271 | -0.0003 | 0.0628  | 0.0975  | -0.0883 | 0.0863  | -0.0011 |
| 6  | 0.1835  | 0.2804  | -0.0688 | 0.0800  | -0.1039 | -0.0295 | -0.0291 | -0.0289 |
| 7  | 0.1652  | 0.1674  | -0.0467 | 0.0839  | -0.1236 | -0.0333 | -0.0485 | -0.0342 |
| 8  | 0.1340  | 0.1197  | -0.0504 | 0.0294  | -0.0891 | 0.0312  | -0.1151 | -0.0025 |
|    | h       | j       | k       | l       | n       | 1       | 2       | 3       |
| h  | 1       |         |         |         |         |         |         |         |
| j  | 0.5573  | 1.0000  |         |         |         |         |         |         |
| k  | -0.0431 | -0.0700 | 1.0000  |         |         |         |         |         |
| l  | -0.2790 | -0.3505 | 0.2774  | 1.0000  |         |         |         |         |
| n  | 0.2167  | 0.4505  | 0.1955  | 0.5436  | 1.0000  |         |         |         |
| 1  | -0.0280 | 0.1626  | 0.0653  | 0.0740  | 0.1378  | 1.0000  |         |         |
| 2  | 0.0434  | 0.1123  | -0.0136 | 0.0118  | 0.0655  | 0.4221  | 1.0000  |         |
| 3  | 0.2891  | 0.3151  | -0.2645 | -0.2403 | 0.0339  | -0.1887 | 0.1221  | 1.0000  |
| 4  | 0.0214  | -0.0959 | 0.0775  | 0.4103  | 0.2268  | 0.1830  | 0.1757  | -0.0244 |
| 5  | -0.4071 | -0.4779 | -0.1695 | -0.3273 | -0.5764 | -0.1294 | -0.0865 | -0.1305 |
| 6  | 0.1462  | 0.0903  | -0.0402 | 0.0592  | 0.1378  | 0.1143  | 0.1182  | 0.1625  |
| 7  | -0.1929 | -0.0809 | -0.1604 | -0.1738 | -0.3372 | 0.0324  | 0.0737  | 0.1478  |



|   |         |         |         |         |         |        |        |        |
|---|---------|---------|---------|---------|---------|--------|--------|--------|
| 8 | 0.0504  | 0.0568  | -0.0115 | -0.1386 | -0.1137 | 0.0515 | 0.0434 | 0.0660 |
|   | 4       | 5       | 6       | 7       | 8       |        |        |        |
| 4 | 1.0000  |         |         |         |         |        |        |        |
| 5 | -0.0565 | 1.0000  |         |         |         |        |        |        |
| 6 | 0.1242  | -0.1237 | 1.0000  |         |         |        |        |        |
| 7 | -0.0275 | 0.1509  | -0.0169 | 1.0000  |         |        |        |        |
| 8 | -0.0106 | 0.0178  | 0.0202  | 0.0812  | 1.0000  |        |        |        |

**Table S4** Cartesian coordinates of clonidine obtained from GED refinement

| Atom | X            | Y            | Z            |
|------|--------------|--------------|--------------|
| N    | -1.879695122 | 0.061381849  | 1.046286814  |
| C    | -1.621525359 | -0.354747009 | -0.255075602 |
| N    | -2.824103123 | -0.723237773 | -0.836023741 |
| C    | -3.882436265 | -0.818042142 | 0.176752308  |
| C    | -3.335955311 | 0.193049119  | 1.215110806  |
| N    | -0.493527753 | -0.443144532 | -0.867288801 |
| C    | 0.698482964  | -0.011279429 | -0.301246257 |
| C    | 1.050676824  | 1.349209024  | -0.116305465 |
| C    | 2.305338525  | 1.754715559  | 0.343552     |
| C    | 3.273135751  | 0.795193792  | 0.643510373  |
| C    | 2.980065167  | -0.5615769   | 0.481778341  |
| C    | 1.720528173  | -0.941189517 | 0.019220849  |
| H    | -1.242813675 | 0.773862716  | 1.445451949  |
| H    | -2.766308792 | -1.41919726  | -1.600798203 |
| H    | -3.955401568 | -1.841794321 | 0.6194092    |
| H    | -4.874326819 | -0.535179136 | -0.235412588 |
| H    | -3.644956147 | -0.054532861 | 2.252877592  |
| H    | -3.675717398 | 1.229133812  | 0.973877846  |
| Cl   | -0.128489424 | 2.572976726  | -0.496357716 |
| H    | 2.514285096  | 2.813438122  | 0.457540652  |
| H    | 4.252667327  | 1.101996622  | 0.998625505  |
| H    | 3.717659478  | -1.323849668 | 0.710777044  |
| Cl   | 1.394457007  | -2.634182214 | -0.16004164  |

## 2 Results of quantum-chemical calculations

### 2.1 Geometries and thermochemical properties for clonidine conformers obtained by the B3LYP/6-31G(d,p) calculations

**Table S5** Cartesian coordinates of **I** conformer found using B3LYP/6-31G(d,p) calculations

| Atom | X         | Y         | Z          |
|------|-----------|-----------|------------|
| N    | -1.834760 | 0.104895  | 1.0228940  |
| C    | -1.578059 | -0.288618 | -0.2824940 |
| N    | -2.789733 | -0.595301 | -0.8710440 |
| C    | -3.835911 | -0.666455 | 0.1438730  |
| C    | -3.273808 | 0.298651  | 1.2035580  |
| N    | -0.458636 | -0.411442 | -0.9024850 |
| C    | 0.746536  | -0.041067 | -0.3282130 |
| C    | 1.157555  | 1.300537  | -0.1495600 |
| C    | 2.422200  | 1.650600  | 0.3180220  |
| C    | 3.339482  | 0.651186  | 0.6316690  |
| C    | 2.984920  | -0.688035 | 0.4748990  |
| C    | 1.717418  | -1.015492 | 0.0049410  |
| H    | -1.193364 | 0.768044  | 1.4349150  |
| H    | -2.758955 | -1.258796 | -1.6319920 |
| H    | -3.946332 | -1.678452 | 0.5603010  |
| H    | -4.803203 | -0.339542 | -0.2462790 |
| H    | -3.591481 | 0.039230  | 2.2167030  |
| H    | -3.579877 | 1.332048  | 0.9883980  |
| Cl   | 0.033293  | 2.601616  | -0.5498240 |
| H    | 2.677543  | 2.698523  | 0.4275070  |
| H    | 4.328041  | 0.913991  | 0.9933760  |
| H    | 3.683195  | -1.481720 | 0.7151070  |
| Cl   | 1.301080  | -2.712687 | -0.1739270 |

Thermochemical data for **I** conformer of clonidine calculated with B3LYP/6-31G(d,p) at 420 K using ideal gas, rigid rotor, harmonic normal mode approximations

|               | E (Thermal),<br>kcal/mol | $c_v$ ,<br>cal/(mol·K) | $S$ ,<br>cal/(mol·K) |
|---------------|--------------------------|------------------------|----------------------|
| Total         | 119.693                  | 64.247                 | 134.34               |
| Electronic    | 0.000                    | 0.000                  | 0.000                |
| Translational | 1.252                    | 2.981                  | 43.890               |
| Rotational    | 1.252                    | 2.981                  | 33.451               |
| Vibrational   | 117.189                  | 58.286                 | 56.998               |

Ee = -1433.0377755 Ha

ZPE = 0.167018 Ha

**Table S6** Cartesian coordinates of **A1** conformer found using B3LYP/6-31G(d,p) calculations

| Atom | X         | Y         | Z         |
|------|-----------|-----------|-----------|
| N    | 2.717484  | -1.031707 | -0.705422 |
| C    | 1.719774  | -0.353013 | -0.267563 |
| N    | 1.900095  | 0.391994  | 0.899259  |
| C    | 3.361222  | 0.444376  | 1.088512  |
| C    | 3.819613  | -0.764846 | 0.22795   |
| N    | 0.478482  | -0.403357 | -0.902015 |
| C    | -0.747155 | -0.039116 | -0.318684 |
| C    | -1.132630 | 1.305098  | -0.142978 |
| C    | -2.362776 | 1.660219  | 0.405748  |
| C    | -3.272194 | 0.666381  | 0.757701  |
| C    | -2.951330 | -0.674679 | 0.561767  |
| C    | -1.705928 | -1.010924 | 0.039484  |
| H    | -0.062537 | 2.599212  | -0.667955 |
| H    | -2.606439 | 2.708996  | 0.528579  |
| H    | -4.236096 | 0.937640  | 1.175223  |
| H    | -3.650189 | -1.461179 | 0.821503  |
| H    | -1.322751 | -2.709367 | -0.186574 |
| H    | 0.436961  | -1.216493 | -1.504457 |
| Cl   | 1.414041  | 1.278206  | 0.951055  |
| H    | 3.776317  | 1.388275  | 0.707863  |
| H    | 3.627201  | 0.351252  | 2.145115  |
| H    | 4.752687  | -0.563496 | -0.308518 |
| Cl   | 3.991394  | -1.650066 | 0.856247  |

Thermochemical data for **A1** conformer of clonidine calculated with B3LYP/6-31G(d,p) using ideal gas, rigid rotor, harmonic normal mode approximations

|               | E (Thermal),<br>kcal/mol | $c_v$ ,<br>cal/(mol·K) | S,<br>cal/(mol·K) |
|---------------|--------------------------|------------------------|-------------------|
| Total         | 119.566                  | 64.196                 | 134.701           |
| Electronic    | 0.000                    | 0.000                  | 0.000             |
| Translational | 1.252                    | 2.981                  | 43.890            |
| Rotational    | 1.252                    | 2.981                  | 33.468            |
| Vibrational   | 117.062                  | 58.234                 | 57.343            |

Ee = -1433.0251552 Ha

ZPE = 0.166791 Ha

**Table S7** Cartesian coordinates of **A2** conformer found using B3LYP/6-31G(d,p) calculations

| Atom | X         | Y         | Z         |
|------|-----------|-----------|-----------|
| N    | -2.775005 | -0.836195 | -0.817439 |
| C    | -1.728716 | -0.295096 | -0.305932 |
| N    | -1.883486 | 0.425299  | 0.877165  |
| C    | -3.212368 | 0.048088  | 1.38456   |
| C    | -3.879388 | -0.491107 | 0.088066  |
| N    | -0.484689 | -0.381520 | -0.922886 |
| C    | 0.741161  | -0.032825 | -0.333924 |
| C    | 1.693146  | -1.014431 | 0.015584  |
| C    | 2.935574  | -0.692397 | 0.553835  |
| C    | 3.254751  | 0.645073  | 0.777123  |
| C    | 2.350627  | 1.647361  | 0.43513   |
| C    | 1.122379  | 1.312048  | -0.133993 |
| H    | 1.302720  | -2.708333 | -0.241525 |
| H    | 3.631496  | -1.484631 | 0.803788  |
| H    | 4.215655  | 0.907217  | 1.207513  |
| H    | 2.597878  | 2.692827  | 0.57794   |
| H    | 0.071735  | 2.608809  | -0.655606 |
| H    | -0.459998 | -1.147181 | -1.583716 |
| Cl   | -1.110844 | 0.413767  | 1.531224  |
| H    | -3.139001 | -0.733771 | 2.154231  |
| H    | -3.733289 | 0.908198  | 1.814394  |
| H    | -4.518602 | -1.358834 | 0.28056   |
| Cl   | -4.509750 | 0.280950  | -0.375272 |

Thermochemical data for **A2** conformer of clonidine calculated with B3LYP/6-31G(d,p) using ideal gas, rigid rotor, harmonic normal mode approximations

|               | E (Thermal),<br>kcal/mol | $c_v$ ,<br>cal/(mol·K) | S,<br>cal/(mol·K) |
|---------------|--------------------------|------------------------|-------------------|
| Total         | 119.448                  | 64.389                 | 136.112           |
| Electronic    | 0.000                    | 0.000                  | 0.000             |
| Translational | 1.252                    | 2.981                  | 43.890            |
| Rotational    | 1.252                    | 2.981                  | 33.460            |
| Vibrational   | 116.944                  | 58.427                 | 58.012            |

Ee = -1433.023614 Ha

ZPE = 0.166456 Ha

**Table S8** Cartesian coordinates of **A3** conformer found using B3LYP/6-31G(d,p) calculations

| Atom | X         | Y         | Z         |
|------|-----------|-----------|-----------|
| N    | -1.776220 | 0.088168  | 1.057201  |
| C    | -1.640778 | -0.413308 | -0.110393 |
| N    | -2.773691 | -0.945156 | -0.741931 |
| C    | -3.916229 | -0.473755 | 0.064113  |
| C    | -3.208547 | -0.004551 | 1.372157  |
| N    | -0.445274 | -0.516830 | -0.826291 |
| C    | 0.763495  | -0.027707 | -0.298769 |
| C    | 1.827273  | -0.890941 | 0.021911  |
| C    | 3.050509  | -0.426740 | 0.496104  |
| C    | 3.233426  | 0.941470  | 0.677109  |
| C    | 2.210570  | 1.831449  | 0.357214  |
| C    | 1.002797  | 1.351517  | -0.142879 |
| H    | 1.614279  | -2.627499 | -0.190331 |
| H    | 3.837199  | -1.134663 | 0.729053  |
| H    | 4.177713  | 1.315886  | 1.05825   |
| H    | 2.346401  | 2.900455  | 0.472103  |
| H    | -0.210122 | 2.514419  | -0.632533 |
| H    | -0.352885 | -1.413825 | -1.288882 |
| Cl   | -2.827371 | -0.756901 | -1.736849 |
| H    | -4.435525 | 0.355498  | -0.433729 |
| H    | -4.639267 | -1.276735 | 0.233888  |
| H    | -3.593162 | 0.956262  | 1.730699  |
| Cl   | -3.352574 | -0.731487 | 2.181889  |

Thermochemical data for **A3** conformer of clonidine calculated with B3LYP/6-31G(d,p) using ideal gas, rigid rotor, harmonic normal mode approximations

|               | E (Thermal),<br>kcal/mol | $c_v$ ,<br>cal/(mol·K) | S,<br>cal/(mol·K) |
|---------------|--------------------------|------------------------|-------------------|
| Total         | 119.558                  | 64.177                 | 134.756           |
| Electronic    | 0.000                    | 0.000                  | 0.000             |
| Translational | 1.252                    | 2.981                  | 43.890            |
| Rotational    | 1.252                    | 2.981                  | 33.459            |
| Vibrational   | 117.055                  | 58.215                 | 57.407            |

Ee = -1433.0251604 Ha

ZPE = 0.166740 Ha

**Table S9** Equilibrium distribution of clonidine conformers at 420 K by means of B3LYP/6-31G(d,p) calculations

| Conformer | $\Delta E_e$ | $\Delta H$ | $S_{420}$ | $p_{420}$ |
|-----------|--------------|------------|-----------|-----------|
| I         | 0.0          | 0.0        | 135.7     | 100       |
| A1        | 8.1          | 7.8        | 136.1     | 0         |
| A2        | 8.9          | 8.5        | 136.7     | 0         |
| A3        | 7.9          | 7.7        | 136.1     | 0         |

$\Delta E_e$  (kcal/mol) is the relative electronic energy;  $H = E_e + \text{ZPE}$  (kcal·mol<sup>-1</sup>), where ZPE is the zero point energy correction calculated from scaled vibrational frequencies;  $S_{420}$  (cal/(K·mol)) is the entropy value at 420 K obtained using scaled frequencies including the entropy of mixing ( $R \ln 2$ ), since all conformers present as an equimolar mixture of the two optical isomers;  $\Delta G_T(i) = \Delta H(i) + T \Delta S_T(i)$  is the Gibbs free energy difference (kcal·mol<sup>-1</sup>);  $p_T(i) = [\exp(-\Delta G_T(i)/RT)] / \Sigma[\exp(-G_T(i)/RT)]$  is the mole fraction of conformers (%).

2.2 Geometries and thermochemical properties for clonidine conformers obtained by the B3LYP/cc-pVTZ calculations

**Table S10** Cartesian coordinates of **I** conformer found using B3LYP/cc-pVTZ calculations

| Atom | X         | Y         | Z         |
|------|-----------|-----------|-----------|
| N    | -1.837584 | 0.099649  | 1.019084  |
| C    | -1.574738 | -0.290820 | -0.280993 |
| N    | -2.780756 | -0.594687 | -0.87445  |
| C    | -3.834237 | -0.662430 | 0.130695  |
| C    | -3.275758 | 0.286861  | 1.199668  |
| N    | -0.456123 | -0.412155 | -0.887614 |
| C    | 0.747940  | -0.040914 | -0.323059 |
| C    | 1.153143  | 1.296983  | -0.148103 |
| C    | 2.413520  | 1.649357  | 0.311271  |
| C    | 3.332506  | 0.657697  | 0.619436  |
| C    | 2.982183  | -0.677169 | 0.466814  |
| C    | 1.718884  | -1.008789 | 0.006219  |
| H    | -1.199492 | 0.752658  | 1.442601  |
| H    | -2.751845 | -1.248831 | -1.638572 |
| H    | -3.954964 | -1.673101 | 0.535458  |
| H    | -4.791094 | -0.325922 | -0.264353 |
| H    | -3.592305 | 0.015381  | 2.2051    |
| H    | -3.579869 | 1.318798  | 0.998034  |
| Cl   | 0.027552  | 2.589641  | -0.541703 |
| H    | 2.665268  | 2.694194  | 0.418086  |
| H    | 4.318330  | 0.923037  | 0.974215  |
| H    | 3.681704  | -1.465265 | 0.703337  |
| Cl   | 1.310381  | -2.701715 | -0.167987 |

Thermochemical data for **I** conformer of clonidine calculated with B3LYP/cc-pVTZ using ideal gas, rigid rotor, harmonic normal mode approximations

|               | E (Thermal),<br>kcal/mol | $c_v$ ,<br>cal/(mol·K) | $S$ ,<br>cal/(mol·K) |
|---------------|--------------------------|------------------------|----------------------|
| Total         | 119.708                  | 64.114                 | 134.197              |
| Electronic    | 0.000                    | 0.000                  | 0.000                |
| Translational | 1.252                    | 2.981                  | 43.890               |
| Rotational    | 1.252                    | 2.981                  | 33.436               |
| Vibrational   | 117.204                  | 58.152                 | 56.870               |

Ee = -1433.2785142 Ha

ZPE = 0.167101 Ha

**Table S11** Cartesian coordinates of **A1** conformer found using B3LYP/cc-pVTZ calculations

| Atom | X         | Y         | Z         |
|------|-----------|-----------|-----------|
| N    | 2.702478  | -1.071461 | -0.703435 |
| C    | 1.711656  | -0.401551 | -0.253611 |
| N    | 1.913664  | 0.342737  | 0.904596  |
| C    | 3.376220  | 0.401693  | 1.066751  |
| C    | 3.821267  | -0.805957 | 0.206931  |
| N    | 0.461704  | -0.470267 | -0.855977 |
| C    | -0.750214 | -0.041521 | -0.301932 |
| C    | -1.080953 | 1.313926  | -0.144956 |
| C    | -2.297625 | 1.722032  | 0.381738  |
| C    | -3.249899 | 0.775460  | 0.726933  |
| C    | -2.984493 | -0.573621 | 0.543435  |
| C    | -1.752522 | -0.964936 | 0.04522   |
| H    | 0.396796  | -1.296828 | -1.431156 |
| H    | 1.421757  | 1.219457  | 0.975582  |
| H    | 3.776513  | 1.341464  | 0.673392  |
| H    | 3.660386  | 0.314602  | 2.114182  |
| H    | 4.738663  | -0.607213 | -0.347407 |
| H    | 4.002410  | -1.686901 | 0.831058  |
| Cl   | 0.037844  | 2.556928  | -0.671212 |
| H    | -2.497768 | 2.777262  | 0.491498  |
| H    | -4.203520 | 1.089488  | 1.126904  |
| H    | -3.717762 | -1.325003 | 0.795237  |
| Cl   | -1.442728 | -2.673782 | -0.16812  |

Thermochemical data for **A1** conformer of clonidine calculated with B3LYP/cc-pVTZ using ideal gas, rigid rotor, harmonic normal mode approximations

|               | E (Thermal),<br>kcal/mol | $c_v$ ,<br>cal/(mol·K) | S,<br>cal/(mol·K) |
|---------------|--------------------------|------------------------|-------------------|
| Total         | 119.603                  | 64.062                 | 134.453           |
| Electronic    | 0.000                    | 0.000                  | 0.000             |
| Translational | 1.252                    | 2.981                  | 43.890            |
| Rotational    | 1.252                    | 2.981                  | 33.454            |
| Vibrational   | 117.099                  | 58.100                 | 57.108            |

Ee = -1433.26655 Ha

ZPE = 0.166928 Ha



**Table S12** Cartesian coordinates of **A2** conformer found using B3LYP/cc-pVTZ calculations

| Atom | X         | Y         | Z         |
|------|-----------|-----------|-----------|
| N    | -2.766112 | -0.835771 | -0.830016 |
| C    | -1.721916 | -0.325703 | -0.29842  |
| N    | -1.882708 | 0.362402  | 0.897673  |
| C    | -3.227767 | 0.007335  | 1.374566  |
| C    | -3.880366 | -0.508829 | 0.066494  |
| N    | -0.473589 | -0.423956 | -0.892249 |
| C    | 0.743693  | -0.033137 | -0.321861 |
| C    | 1.723250  | -0.982023 | 0.019328  |
| C    | 2.955041  | -0.624089 | 0.543376  |
| C    | 3.236762  | 0.716848  | 0.760375  |
| C    | 2.305563  | 1.687199  | 0.422571  |
| C    | 1.088008  | 1.317271  | -0.133133 |
| H    | -0.433982 | -1.189183 | -1.547126 |
| H    | -1.124640 | 0.324904  | 1.561588  |
| H    | -3.181492 | -0.777186 | 2.136452  |
| H    | -3.738347 | 0.871149  | 1.797688  |
| H    | -4.515353 | -1.378723 | 0.235237  |
| H    | -4.504215 | 0.265296  | -0.391321 |
| Cl   | 1.383780  | -2.680871 | -0.234802 |
| H    | 3.673355  | -1.392303 | 0.787228  |
| H    | 4.189630  | 1.006718  | 1.180308  |
| H    | 2.523875  | 2.735962  | 0.557223  |
| Cl   | 0.006480  | 2.580013  | -0.656075 |

Thermochemical data for **A2** conformer of clonidine calculated with B3LYP/cc-pVTZ using ideal gas, rigid rotor, harmonic normal mode approximations

|               | E (Thermal),<br>kcal/mol | $c_v$ ,<br>cal/(mol·K) | S,<br>cal/(mol·K) |
|---------------|--------------------------|------------------------|-------------------|
| Total         | 119.498                  | 64.243                 | 135.208           |
| Electronic    | 0.000                    | 0.000                  | 0.000             |
| Translational | 1.252                    | 2.981                  | 43.890            |
| Rotational    | 1.252                    | 2.981                  | 33.446            |
| Vibrational   | 116.994                  | 58.281                 | 57.871            |

Ee = -1433.265027 Ha

ZPE = 0.166595 Ha

**Table S13** Cartesian coordinates of **A3** conformer found using B3LYP/cc-pVTZ calculations

| Atom | X         | Y         | Z         |
|------|-----------|-----------|-----------|
| N    | -1.779415 | 0.096718  | 1.046757  |
| C    | -1.637112 | -0.410272 | -0.110422 |
| N    | -2.767057 | -0.943544 | -0.737214 |
| C    | -3.911095 | -0.475241 | 0.065868  |
| C    | -3.208925 | 0.008832  | 1.365589  |
| N    | -0.442735 | -0.519677 | -0.816568 |
| C    | 0.764883  | -0.028074 | -0.296983 |
| C    | 1.822352  | -0.889216 | 0.024649  |
| C    | 3.040023  | -0.428076 | 0.498409  |
| C    | 3.223384  | 0.934393  | 0.679018  |
| C    | 2.206685  | 1.821483  | 0.356752  |
| C    | 1.004150  | 1.345063  | -0.142841 |
| H    | -0.351007 | -1.410574 | -1.282866 |
| H    | -2.822315 | -0.771764 | -1.730744 |
| H    | -4.433572 | 0.342375  | -0.437295 |
| H    | -4.623639 | -1.279623 | 0.243057  |
| H    | -3.589096 | 0.971605  | 1.70916   |
| H    | -3.350935 | -0.704141 | 2.181802  |
| Cl   | 1.608568  | -2.618474 | -0.190067 |
| H    | 3.822890  | -1.133698 | 0.732311  |
| H    | 4.163707  | 1.306590  | 1.060468  |
| H    | 2.343311  | 2.886413  | 0.470024  |
| Cl   | -0.200389 | 2.505827  | -0.635638 |

Thermochemical data for **A3** conformer of clonidine calculated with B3LYP/cc-pVTZ using ideal gas, rigid rotor, harmonic normal mode approximations

|               | E (Thermal),<br>kcal/mol | $c_v$ ,<br>cal/(mol·K) | S,<br>cal/(mol·K) |
|---------------|--------------------------|------------------------|-------------------|
| Total         | 119.631                  | 64.003                 | 134.483           |
| Electronic    | 0.000                    | 0.000                  | 0.000             |
| Translational | 1.252                    | 2.981                  | 43.890            |
| Rotational    | 1.252                    | 2.981                  | 33.443            |
| Vibrational   | 117.127                  | 58.041                 | 57.149            |

Ee = -1433.2669916 Ha

ZPE = 0.166946 Ha

**Table S14** Equilibrium distribution of clonidine conformers at 420 K by means of B3LYP/cc-pVTZ calculations

| Conformer | $\Delta E_e$ | $\Delta H$ | $S_{420}$ | $p_{420}$ |
|-----------|--------------|------------|-----------|-----------|
| I         | 0.0          | 0.0        | 135.6     | 100       |
| A1        | 7.5          | 7.4        | 135.8     | 0         |
| A2        | 8.5          | 8.1        | 136.6     | 0         |
| A3        | 7.2          | 7.1        | 135.9     | 0         |

$\Delta E_e$  (kcal/mol) is the relative electronic energy;  $H = E_e + \text{ZPE}$  (kcal·mol<sup>-1</sup>), where ZPE is the zero point energy correction calculated from scaled vibrational frequencies;  $S_{420}$  (cal/(K·mol)) is the entropy value at 420 K obtained using scaled frequencies including the entropy of mixing ( $R \ln 2$ ), since all conformers present as an equimolar mixture of the two optical isomers;  $\Delta G_T(i) = \Delta H(i) + T \Delta S_T(i)$  is the Gibbs free energy difference (kcal·mol<sup>-1</sup>);  $p_T(i) = [\exp(-\Delta G_T(i)/RT)] / \Sigma[\exp(-G_T(i)/RT)]$  is the mole fraction of conformers (%).

2.3 Geometries and thermochemical properties for clonidine conformers obtained by the MP2/cc-pVTZ calculations

**Table S15** Cartesian coordinates of I conformer found using MP2/cc-pVTZ calculations

| Atom | X         | Y         | Z         |
|------|-----------|-----------|-----------|
| N    | -1.704501 | 0.033546  | 1.012663  |
| C    | -1.531031 | -0.333559 | -0.309834 |
| N    | -2.775533 | -0.613675 | -0.832894 |
| C    | -3.735403 | -0.716932 | 0.257116  |
| C    | -3.124615 | 0.269875  | 1.24871   |
| N    | -0.444154 | -0.447567 | -0.985336 |
| C    | 0.732290  | -0.040802 | -0.372932 |
| C    | 1.066400  | 1.312414  | -0.170734 |
| C    | 2.291776  | 1.714500  | 0.352618  |
| C    | 3.234857  | 0.751318  | 0.695077  |
| C    | 2.948992  | -0.599145 | 0.5186    |
| C    | 1.717141  | -0.976231 | -0.004802 |
| H    | -3.415553 | 1.292491  | 0.995475  |
| H    | -0.093472 | 2.531244  | -0.602937 |
| H    | 2.493932  | 2.768109  | 0.478878  |
| H    | 4.191392  | 1.052663  | 1.097785  |
| H    | 3.665727  | -1.362514 | 0.783666  |
| H    | 1.366858  | -2.658191 | -0.203222 |
| Cl   | -1.032723 | 0.690252  | 1.380081  |
| H    | -2.785023 | -1.285400 | -1.583937 |
| H    | -3.765782 | -1.720264 | 0.690506  |
| H    | -4.733448 | -0.426960 | -0.059435 |
| Cl   | -3.399204 | 0.054978  | 2.27773   |

Thermochemical data for I conformer of clonidine calculated with MP2/cc-pVTZ using ideal gas, rigid rotor, harmonic normal mode approximations

|               | E (Thermal),<br>kcal/mol | $c_v$ ,<br>cal/(mol·K) | $S$ ,<br>cal/(mol·K) |
|---------------|--------------------------|------------------------|----------------------|
| Total         | 119.173                  | 64.596                 | 134.194              |
| Electronic    | 0.000                    | 0.000                  | 0.000                |
| Translational | 1.252                    | 2.981                  | 43.890               |
| Rotational    | 1.252                    | 2.981                  | 33.354               |
| Vibrational   | 116.669                  | 58.634                 | 56.950               |

Ee = -1428.6038924 Ha

ZPE = 0.166112 Ha

**Table S16** Cartesian coordinates of **A1** conformer found using MP2/cc-pVTZ calculations

| Atom | X         | Y         | Z         |
|------|-----------|-----------|-----------|
| N    | 2.716807  | -1.003898 | -0.710601 |
| C    | 1.679541  | -0.375440 | -0.289469 |
| N    | 1.778860  | 0.304168  | 0.924179  |
| C    | 3.228998  | 0.442378  | 1.11966   |
| C    | 3.738224  | -0.766006 | 0.319394  |
| N    | 0.469206  | -0.408683 | -0.968866 |
| C    | -0.732570 | -0.038134 | -0.35724  |
| C    | -1.077540 | 1.309336  | -0.162806 |
| C    | -2.279375 | 1.684536  | 0.42932   |
| C    | -3.193071 | 0.705502  | 0.804285  |
| C    | -2.906469 | -0.639251 | 0.594172  |
| C    | -1.686206 | -0.994549 | 0.030938  |
| H    | 0.412736  | -1.235612 | -1.547303 |
| H    | 1.251326  | 1.163430  | 0.980417  |
| H    | 3.594499  | 1.376855  | 0.68516   |
| H    | 3.491419  | 0.406345  | 2.17355   |
| H    | 4.712422  | -0.590609 | -0.130697 |
| H    | 3.813288  | -1.648879 | 0.959296  |
| Cl   | 0.004619  | 2.551900  | -0.700327 |
| H    | -2.495248 | 2.733741  | 0.566331  |
| H    | -4.133485 | 0.991637  | 1.253219  |
| H    | -3.606367 | -1.412481 | 0.874252  |
| Cl   | -1.323671 | -2.669298 | -0.208894 |

Thermochemical data for **A1** conformer of clonidine calculated with MP2/cc-pVTZ using ideal gas, rigid rotor, harmonic normal mode approximations.

|               | E (Thermal),<br>kcal/mol | $c_v$ ,<br>cal/(mol·K) | S,<br>cal/(mol·K) |
|---------------|--------------------------|------------------------|-------------------|
| Total         | 118.988                  | 64.657                 | 135.713           |
| Electronic    | 0.000                    | 0.000                  | 0.000             |
| Translational | 1.252                    | 2.981                  | 43.890            |
| Rotational    | 1.252                    | 2.981                  | 33.380            |
| Vibrational   | 116.484                  | 58.696                 | 58.443            |

E<sub>e</sub> = -1428.5909445 Ha

ZPE = 0.165716 Ha

**Table S17** Cartesian coordinates of **A2** conformer found using MP2/cc-pVTZ calculations

| Atom | X         | Y         | Z         |
|------|-----------|-----------|-----------|
| N    | 2.778703  | 0.742923  | -0.781844 |
| C    | 1.698947  | 0.204115  | -0.342338 |
| N    | 1.770890  | -0.518963 | 0.845111  |
| C    | 3.031772  | -0.072566 | 1.450845  |
| C    | 3.807534  | 0.355806  | 0.194732  |
| N    | 0.499157  | 0.263099  | -1.037095 |
| C    | -0.721785 | 0.030553  | -0.389787 |
| C    | -1.568268 | 1.084569  | -0.005863 |
| C    | -2.797895 | 0.863149  | 0.604339  |
| C    | -3.197511 | -0.443255 | 0.866781  |
| C    | -2.389245 | -1.513877 | 0.499468  |
| C    | -2.389245 | -1.513877 | 0.499468  |
| H    | 0.503451  | 1.041772  | -1.681472 |
| H    | 0.947383  | -0.485739 | 1.430146  |
| H    | 2.870080  | 0.779634  | 2.116541  |
| H    | 3.512755  | -0.875948 | 2.002476  |
| H    | 4.492163  | 1.178447  | 0.386064  |
| H    | 4.384703  | -0.481943 | -0.204904 |
| Cl   | -1.055760 | 2.710483  | -0.308249 |
| H    | -3.416039 | 1.705677  | 0.876866  |
| H    | -4.145944 | -0.627832 | 1.351017  |
| H    | -2.697683 | -2.533267 | 0.678381  |
| Cl   | -0.233906 | -2.622258 | -0.666264 |

Thermochemical data for **A2** conformer of clonidine calculated with MP2/cc-pVTZ using ideal gas, rigid rotor, harmonic normal mode approximations.

|               | E (Thermal),<br>kcal/mol | $c_v$ ,<br>cal/(mol·K) | S,<br>cal/(mol·K) |
|---------------|--------------------------|------------------------|-------------------|
| Total         | 118.928                  | 64.696                 | 135.395           |
| Electronic    | 0.000                    | 0.000                  | 0.000             |
| Translational | 1.252                    | 2.981                  | 43.890            |
| Rotational    | 1.252                    | 2.981                  | 33.371            |
| Vibrational   | 116.424                  | 58.734                 | 58.134            |

Ee = -1428.5900023 Ha

ZPE = 0.165589 Ha

**Table S18** Cartesian coordinates of **A3** conformer found using MP2/cc-pVTZ calculations

| Atom | X         | Y         | Z         |
|------|-----------|-----------|-----------|
| N    | 2.778701  | 0.742939  | -0.781838 |
| C    | 1.698948  | 0.204122  | -0.342339 |
| N    | 1.770894  | -0.518970 | 0.845104  |
| C    | 3.031777  | -0.072566 | 1.450842  |
| C    | 3.807535  | 0.355813  | 0.19473   |
| N    | 0.499154  | 0.263106  | -1.037098 |
| C    | -0.721784 | 0.030552  | -0.389789 |
| C    | -1.568273 | 1.084565  | -0.005859 |
| C    | -2.797902 | 0.863138  | 0.604336  |
| C    | -3.197517 | -0.443268 | 0.866773  |
| C    | -2.389244 | -1.513884 | 0.499461  |
| C    | -1.174845 | -1.276833 | -0.14011  |
| H    | 0.503444  | 1.041798  | -1.681453 |
| H    | 0.947389  | -0.485748 | 1.430144  |
| H    | 2.870078  | 0.779634  | 2.116537  |
| H    | 3.512758  | -0.875951 | 2.00247   |
| H    | 4.492167  | 1.178452  | 0.386066  |
| H    | 4.384700  | -0.481934 | -0.204915 |
| Cl   | -1.055771 | 2.710483  | -0.308241 |
| H    | -3.416045 | 1.705666  | 0.876866  |
| H    | -4.145953 | -0.627852 | 1.351001  |
| H    | -2.697672 | -2.533278 | 0.678371  |
| Cl   | -0.233892 | -2.622256 | -0.666261 |

Thermochemical data for **A3** conformer of clonidine calculated with MP2/cc-pVTZ using ideal gas, rigid rotor, harmonic normal mode approximations.

|               | E (Thermal),<br>kcal/mol | $c_v$ ,<br>cal/(mol·K) | S,<br>cal/(mol·K) |
|---------------|--------------------------|------------------------|-------------------|
| Total         | 118.928                  | 64.696                 | 135.393           |
| Electronic    | 0.000                    | 0.000                  | 0.000             |
| Translational | 1.252                    | 2.981                  | 43.890            |
| Rotational    | 1.252                    | 2.981                  | 33.371            |
| Vibrational   | 116.424                  | 58.734                 | 58.132            |

Ee = -1428.5900019 Ha

ZPE = 0.165590 Ha
